# Supplementary material for: The Role of Mitochondrial Mutations and Chronic Inflammation in Diabetes
Source: MDPI journal article supplement (doi:10.3390/ijms22136733), 2021-06-23
Supplement: s1 [file s1]

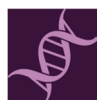

Supplementary Table S1

**Supplementary Table S1** presents a summary of known mtDNA mutations related to the main forms of diabetes (T1D, T2D, MIDD and GDM). It combines data from case studies (one patient/family) and wide population analyses. All mentioned mutations were identified retrospectively, from patients with diagnosed diabetes (internationally recognized and clinically approved criteria, but still could vary depending on the local clinical practice).

**Table S1. Diabetes mellitus-related mtDNA mutations.**

| Mutation                                    | Gene                | DM type  | Patient population                                                | Reference                    |
|---------------------------------------------|---------------------|----------|-------------------------------------------------------------------|------------------------------|
| m.T58C                                      |                     | T2D      | Italian T2D patients                                              | Cormio et al. 2009           |
| m.C151T                                     | OriH                |          |                                                                   |                              |
| m.568 poly C length variation (up to 12 bp) | D-loop              | MIDD     | Turkish family case study                                         | Janssen et al. 2006          |
| m.8281 length variation, 2 9-bp repeats     | tRNA <sup>Lys</sup> |          |                                                                   |                              |
| m.C1310T                                    | 12S rRNA            | T2D      | Japanese T2D patients                                             | Tawata et al. 1998           |
| m.G1438A                                    |                     |          |                                                                   |                              |
| m.A12026G                                   | ND4                 |          |                                                                   |                              |
| m.A1382C                                    | MOTS-c/12S rRNA     | T2D      | Asian T2D patients                                                | Zempo et al. 2021            |
| m.A3156G*                                   | 16S rRNA            | T1D, T2D | Japanese T1D, T2D and GDM patients                                | Ohkubo et al. 2001           |
| m.G3357A*                                   | ND1                 |          |                                                                   |                              |
| m.C3375A*                                   |                     |          |                                                                   |                              |
| m.T3394C*                                   |                     |          |                                                                   |                              |
| m.T3200C                                    | 16S rRNA            | T2D      | Chinese T2D patients                                              | Yang et al. 2002             |
| m.A3243G                                    | tRNA <sup>Leu</sup> | MIDD     | Caucasian family case study                                       | Van den Ouweland et al. 1992 |
| m.C3256T                                    | tRNA <sup>Leu</sup> | MIDD     | Japanese family case study                                        | Hirai et al. 1998            |
| m.T3264C                                    | tRNA <sup>Leu</sup> | MIDD     | Japanese family case study                                        | Suzuki et al. 1997           |
| m.T3271C*                                   | tRNA <sup>Leu</sup> | MIDD     | Taiwanese family case study                                       | Chen et al. 2004             |
| m.A3302G                                    | tRNA <sup>Leu</sup> | T2D      | Han Chinese family case study                                     | Ding et al. 2016             |
| m.G3316A                                    | ND1                 | T2D      | Japanese patients                                                 | Odawara et al. 1996          |
| m.T3394C                                    | ND1                 | T2D      | Chinese patients                                                  | Tang et al. 2006             |
| m.A14693G                                   | tRNA <sup>Glu</sup> | T2D      | Indonesian patients                                               | Pranoto et al. 2005          |
| m.C3254A                                    | tRNA <sup>Leu</sup> | GDM      | Healthy subjects with no diabetes history and symptoms, Singapore | Chen et al. 2000             |
| m.T3398C                                    | ND1                 |          |                                                                   |                              |
| m.A3399T                                    |                     |          |                                                                   |                              |
| m.T3394C                                    | ND1                 | T2D      |                                                                   | Liao et al. 2008             |

|                                         |                     |          |                                                                    |                                        |
|-----------------------------------------|---------------------|----------|--------------------------------------------------------------------|----------------------------------------|
| m.G4491A                                | ND2                 |          | Han Chinese patients                                               |                                        |
| m.C5178A                                |                     |          |                                                                    |                                        |
| m.A10398G                               | ND3                 |          |                                                                    |                                        |
| m.T16189C                               | mtDNA               |          |                                                                    |                                        |
| m.T16519C                               | control region      |          |                                                                    |                                        |
| m.T3548C                                | ND1                 | MIDD     | Brazilian patients                                                 | Crispim et al. 2008                    |
| m.A8348G                                | tRNA <sup>Lys</sup> |          |                                                                    |                                        |
| m.C8393T                                | ATP8                |          |                                                                    |                                        |
| m.C8478T                                |                     |          |                                                                    |                                        |
| m.T8551C                                | ATP6, ATP8          |          |                                                                    |                                        |
| m.A12026G                               | ND4                 |          |                                                                    |                                        |
| m.G4284A                                | tRNA <sup>Ile</sup> | MIDD     | Italian patient with multisystem progressing disorders             | Corona et al. 2002                     |
| m.A4738C**                              | ND2                 | T1D      | ALR/Lt, a mouse strain with strong resistance to T1D               | Mathews et al. 2005                    |
| m.5172 11 and 12 as polymorphic locus** | OriL                | T2D      | AKR/J (C57BL/6J-mtAKR/J; B6-mtAKR) on a C57BL/6J (B6) mouse strain | Hirose et al. 2018                     |
| m.C5178A                                | ND2                 | T1D, T2D | Japanese population                                                | Wang et al. 2001, Uchigata et al. 2002 |
| m.G7778T natural polymorphism**         | ATP8                | T1D, T2D | C57BL/6J-mtFVB/N (B6-mtFVB) mouse strain                           | Weiss et al. 2012, Yu et al. 2009      |
| m.A8296G                                | tRNA <sup>Lys</sup> | MIDD     | Japanese patients                                                  | Kameoka et al. 1998                    |
| m.A8344G                                | tRNA <sup>Lys</sup> | T2D      | Japanese family case                                               | Suzuki et al. 1994                     |
| m.A8344G*                               | tRNA <sup>Lys</sup> | GDM      | Asian Indian population with no diabetes history                   | Khan et al. 2015                       |
| m.T8356C                                | tRNA <sup>Lys</sup> | T2D      | Coimbatore T2D patients                                            | Vijaya Padma et al. 2010               |
| m.T8414G                                | ATP8                | T2D      | Chinese Uyghur T2D patients                                        | Jing et al. 2017                       |
| m.G2706A                                | 16S RNA             | T2D      |                                                                    |                                        |
| m.C8561G                                | ATP6, ATP8          | T2D      | Case study of one family                                           | Kytövuori et al. 2016                  |
| m.A8860G*                               | ATP6                | MIDD     | Chinese family case study with MIDD and MELAS                      | Li et al. 2015a                        |
| m.A15326G*                              | CYB                 |          |                                                                    |                                        |
| m.G9267C*                               | COX3                | MIDD     | Tunesian family case with MIDD                                     | Tabebi et al. 2015                     |
| m.G5913A*                               | COX1                |          |                                                                    |                                        |
| m.A9827G**                              | COX3                | T1D      | ALR/Lt strain, NOD/Lt and NOD/LtDvs mouse sub-strains              | Mathews et al. 2005                    |
| m.T10003C                               | tRNA <sup>Gly</sup> | MIDD     | Han Chinese family with MIDD                                       | Li et al. 2015b, Liu et al. 2015       |

|             |                                                        |      |                                                          |                                         |
|-------------|--------------------------------------------------------|------|----------------------------------------------------------|-----------------------------------------|
| m.C12258A   | tRNA <sup>Ser</sup>                                    | MIDD | British family case with MIDD                            | Lynn et al. 1998, Choo-Kang et al. 2002 |
| m.G13997A** | ND6                                                    | T2D  | Aged mito-mice ND6 <sup>M</sup> mouse strain             | Hashizume et al. 2012                   |
| m.T14577C   | ND6                                                    | T2D  | Japanese family                                          | Tawata et al. 2000                      |
| m.T14577C*  | tRNA <sup>Glu</sup>                                    | MIDD | Han Chinese patients                                     | Wang et al. 2016                        |
| m.A14693G*  | tRNA <sup>Glu</sup>                                    | MIDD | Taiwan MELAS patient with DM mother and healthy siblings | Tzen et al. 2003                        |
| m.T14709C   | tRNA <sup>Glu</sup>                                    | T2D  | Patient with muscle weakness due to COX deficiency       | Hao et al. 1995                         |
| m.A15746G   | CYB                                                    | T2D  | Taiwan T2D patients                                      | Loo et al. 2014                         |
| m.T16093C*  | Non-coding region                                      | MIDD | Chinese patients with MIDD                               | Jiang et al. 2019                       |
| m.T16189C   | mtDNA control region for replication and transcription | T2D  | Asian patients                                           | Park et al. 2008                        |
|             |                                                        |      | UK patients                                              | Poulton et al. 2002                     |
|             |                                                        |      | Chinese patients                                         | Weng et al. 2005                        |
|             |                                                        |      | Finnish patients                                         | Soini et al. 2012                       |

\*- mutation identified in addition to m.3243G;

\*\* - mouse model

## References

- Chen, Y., Liao, W.X., Roy, A.C., Loganath, A., and Ng, S.C. (2000). Mitochondrial gene mutations in gestational diabetes mellitus. *Diabetes Research and Clinical Practice* 48, 29–35.
- Chen, Y.-N., Liou, C.-W., Huang, C.-C., Lin, T.-K., and Wei, Y.-H. (2004). Maternally inherited diabetes and deafness (MIDD) syndrome: a clinical and molecular genetic study of a Taiwanese family. *Chang Gung Med J* 27, 66–73.
- Choo-Kang, A.T.W., Lynn, S., Taylor, G.A., Daly, M.E., Sihota, S.S., Wardell, T.M., Chinnery, P.F., Turnbull, D.M., and Walker, M. (2002). Defining the importance of mitochondrial gene defects in maternally inherited diabetes by sequencing the entire mitochondrial genome. *Diabetes* 51, 2317–2320.
- Cormio, A., Milella, F., Marra, M., Pala, M., Lezza, A.M.S., Bonfigli, A.R., Franceschi, C., Cantatore, P., and Gadaleta, M.N. (2009). Variations at the H-strand replication origins of mitochondrial DNA and mitochondrial DNA content in the blood of type 2 diabetes patients. *Biochimica et Biophysica Acta (BBA) - Bioenergetics* 1787, 547–552.
- Corona, P., Lamantea, E., Greco, M., Carrara, F., Agostino, A., Guidetti, D., Dotti, M.T., Mariotti, C., and Zeviani, M. (2002). Novel heteroplasmic mtDNA mutation in a family with heterogeneous clinical presentations. *Ann Neurol* 51, 118–122.
- Crispim, D., Estivalet, A.A.F., Roisenberg, I., Gross, J.L., and Canani, L.H. (2008). Prevalence of 15 mitochondrial DNA mutations among type 2 diabetic patients with or without clinical characteristics of maternally inherited diabetes and deafness. *Arq Bras Endocrinol Metab* 52, 1228–1235.
- Ding, Y., Zhuo, G., and Zhang, C. (2016). The Mitochondrial tRNA Leu(UUR) A3302G Mutation may be Associated With Insulin Resistance in Woman With Polycystic Ovary Syndrome. *Reprod Sci* 23, 228–233.
- Hao, H., Bonilla, E., Manfredi, G., DiMauro, S., and Moraes, C.T. (1995). Segregation patterns of a novel mutation in the mitochondrial tRNA glutamic acid gene associated with myopathy and diabetes mellitus. *Am J Hum Genet* 56, 1017–1025.
- Hashizume, O., Shimizu, A., Yokota, M., Sugiyama, A., Nakada, K., Miyoshi, H., Itami, M., Ohira, M., Nagase, H., Takenaga, K., et al. (2012). Specific mitochondrial DNA mutation in mice regulates diabetes and lymphoma development. *Proceedings of the National Academy of Sciences* 109, 10528–10533.
- Hirai, M., Suzuki, S., Onoda, M., Hinokio, Y., Ai, L., Hirai, A., Ohtomo, M., Komatsu, K., Kasuga, S., Satoh, Y., et al. (1996). Mitochondrial DNA 3394 Mutation in the NADH Dehydrogenase Subunit 1 Associated with Non-Insulin-Dependent Diabetes Mellitus. *Biochemical and Biophysical Research Communications* 219, 951–955.

- Hirai, M., Suzuki, S., Onoda, M., Hinokio, Y., Hirai, A., Ohtomo, M., Chiba, M., Kasuga, S., Hirai, S., Satoh, Y., et al. (1998). Mitochondrial Deoxyribonucleic Acid 3256C-T Mutation in a Japanese Family with Noninsulin-Dependent Diabetes Mellitus 1. *The Journal of Clinical Endocrinology & Metabolism* 83, 992–994.
- Hirose, M., Schilf, P., Gupta, Y., Zarse, K., Künstner, A., Fährnich, A., Busch, H., Yin, J., Wright, M.N., Ziegler, A., et al. (2018). Low-level mitochondrial heteroplasmy modulates DNA replication, glucose metabolism and lifespan in mice. *Sci Rep* 8, 5872.
- Janssen, G., Neu, A., 't Hart, L., van de Sande, C., and Antonie Maassen, J. (2006). Novel Mitochondrial DNA Length Variants and Genetic Instability in a Family with Diabetes and Deafness. *Exp Clin Endocrinol Diabetes* 114, 168–174.
- Jiang, W., Li, R., Zhang, Y., Wang, P., Wu, T., Lin, J., Yu, J., and Gu, M. (2017). Mitochondrial DNA Mutations Associated with Type 2 Diabetes Mellitus in Chinese Uyghur Population. *Sci Rep* 7, 16989.
- Jiang, Z., Zhang, Y., Yan, J., Li, F., Geng, X., Lu, H., Wei, X., Feng, Y., Wang, C., and Jia, W. (2019). De Novo Mutation of m.3243A>G together with m.16093T>C Associated with Atypical Clinical Features in a Pedigree with MIDD Syndrome. *Journal of Diabetes Research* 2019, 1–8.
- Kameoka, K., Isotani, H., Tanaka, K., Azukari, K., Fujimura, Y., Shiota, Y., Sasaki, E., Majima, M., Furukawa, K., Haginomori, S., et al. (1998). Novel Mitochondrial DNA Mutation in tRNA<sup>Lys</sup>(8296A → G) Associated with Diabetes. *Biochemical and Biophysical Research Communications* 245, 523–527.
- Khan, I.A., Shaik, N.A., Pasupuleti, N., Chava, S., Jahan, P., Hasan, Q., and Rao, P. (2015). Screening of mitochondrial mutations and insertion-deletion polymorphism in gestational diabetes mellitus in the Asian Indian population. *Saudi J Biol Sci* 22, 243–248.
- Kytövuori, L., Lipponen, J., Rusanen, H., Komulainen, T., Martikainen, M.H., and Majamaa, K. (2016). A novel mutation m.8561C>G in MT-ATP6/8 causing a mitochondrial syndrome with ataxia, peripheral neuropathy, diabetes mellitus, and hypergonadotropic hypogonadism. *J Neurol* 263, 2188–2195.
- Li, W., Zhang, W., Li, F., and Wang, C. (2015a). Mitochondrial genetic analysis in a Chinese family suffering from both mitochondrial encephalomyopathy with lactic acidosis and stroke-like episodes and diabetes. *Int J Clin Exp Pathol* 8, 7022–7027.
- Li, W., Wen, C., Li, W., Wang, H., Guan, X., Zhang, W., Ye, W., and Lu, J. (2015b). The tRNA<sup>Gly</sup> T10003C mutation in mitochondrial haplogroup M11b in a Chinese family with diabetes decreases the steady-state level of tRNA<sup>Gly</sup>, increases aberrant reactive oxygen species production, and reduces mitochondrial membrane potential. *Mol Cell Biochem* 408, 171–179.
- Liao, W.-Q., Pang, Y., Yu, C.-A., Wen, J.-Y., Zhang, Y.-G., and Li, X.-H. (2008). Novel Mutations of Mitochondrial DNA Associated with Type 2 Diabetes in Chinese Han Population. *Tohoku J. Exp. Med.* 215, 377–384.
- Liu, H., Li, R., Li, W., Wang, M., Ji, J., Zheng, J., Mao, Z., Mo, J.Q., Jiang, P., Lu, J., et al. (2015). Maternally inherited diabetes is associated with a homoplasmic T10003C mutation in the mitochondrial tRNA<sup>Gly</sup> gene. *Mitochondrion* 21, 49–57.
- Loo, J.-H., Trejaut, J.A., Yen, J.-C., Chen, Z.-S., Ng, W.-M., Huang, C.-Y., Hsu, K.-N., Hung, K.-H., Hsiao, Y., Wei, Y.-H., et al. (2014). Mitochondrial DNA association study of type 2 diabetes with or without ischemic stroke in Taiwan. *BMC Res Notes* 7, 223.
- Lynn, S., Wardell, T., Johnson, M.A., Chinnery, P.F., Daly, M.E., Walker, M., and Turnbull, D.M. (1998). Mitochondrial diabetes: investigation and identification of a novel mutation. *Diabetes* 47, 1800–1802.
- Mathews, C.E., Leiter, E.H., Spirina, O., Bykhovskaya, Y., Gusdon, A.M., Ringquist, S., and Fischel-Ghodsian, N. (2005). mt-Nd2 Allele of the ALR/Lt mouse confers resistance against both chemically induced and autoimmune diabetes. *Diabetologia* 48, 261–267.
- Odawara, M., Sasaki, K., and Yamashita, K. (1996). A G-to-A Substitution at Nucleotide Position 3316 in Mitochondrial DNA Is Associated with Japanese Non-Insulin-Dependent Diabetes Mellitus. *Biochemical and Biophysical Research Communications* 227, 147–151.
- Ohkubo, K., Yamano, A., Nagashima, M., Mori, Y., Anzai, K., Akehi, Y., Nomiyama, R., Asano, T., Urae, A., and Ono, J. (2001). Mitochondrial Gene Mutations in the tRNA<sup>Leu</sup>(UUR) Region and Diabetes: Prevalence and Clinical Phenotypes in Japan. *Clinical Chemistry* 47, 1641–1648.
- van den Ouweland, J.M.W., Lemkes, H.H.P.J., Ruitenbeek, W., Sandkuijl, L.A., de Vijlder, M.F., Struyvenberg, P.A.A., van de Kamp, J.J.P., and Maassen, J.A. (1992). Mutation in mitochondrial tRNA<sup>Leu</sup>(UUR) gene in a large pedigree with maternally transmitted type II diabetes mellitus and deafness. *Nat Genet* 1, 368–371.
- Park, K.S., Chan, J.C., Chuang, L.-M., Suzuki, S., Araki, E., Nanjo, K., Ji, L., Ng, M., Nishi, M., Furuta, H., et al. (2008). A mitochondrial DNA variant at position 16189 is associated with type 2 diabetes mellitus in Asians. *Diabetologia* 51, 602–608.
- Poulton, J. (2002). Type 2 diabetes is associated with a common mitochondrial variant: evidence from a population-based case-control study. *Human Molecular Genetics* 11, 1581–1583.
- Poulton, J., Brown, M.S., Cooper, A., Marchington, D.R., and Phillips, D.I.W. (1998). A common mitochondrial DNA variant is associated with insulin resistance in adult life. *Diabetologia* 41, 54–58.
- Pranoto, A. (2005). The Association of Mitochondrial DNA Mutation G3316a and T3394c with Diabetes Mellitus. p.
- Soini, H.K., Moilanen, J.S., Finnilä, S., and Majamaa, K. (2012). Mitochondrial DNA sequence variation in Finnish patients with matrilineal diabetes mellitus. *BMC Res Notes* 5, 350.
- Suzuki, S., Hinokio, Y., Hirai, S., Onoda, M., Matsumoto, M., Ohtomo, M., Kawasaki, H., Satoh, Y., Akai, H., Abe, K., et al. (1994). Diabetes With Mitochondrial Gene tRNA<sup>Lys</sup> Mutation. *Diabetes Care* 17, 1428–1432.
- Suzuki, Y., Suzuki, S., Hinokio, Y., Chiba, M., Atsumi, Y., Hosokawa, K., Shimada, A., Asahina, T., and Matsuoka, K. (1997). Diabetes Associated With a Novel 3264 Mitochondrial tRNA<sup>Leu</sup>(UUR) mutation. *Diabetes Care* 20, 1138–1140.

- Tabebi, M., Mkaouar-Rebai, E., Mnif, M., Kallabi, F., Ben Mahmoud, A., Ben Saad, W., Charfi, N., Keskes-Ammar, L., Kamoun, H., Abid, M., et al. (2015). A novel mutation MT-COIII m.9267G>C and MT-COI m.5913G>A mutation in mitochondrial genes in a Tunisian family with maternally inherited diabetes and deafness (MIDD) associated with severe nephropathy. *Biochemical and Biophysical Research Communications* 459, 353–360.
- Tang, D.-L., Zhou, X., Li, X., Zhao, L., and Liu, F. (2006). Variation of mitochondrial gene and the association with type 2 diabetes mellitus in a Chinese population. *Diabetes Research and Clinical Practice* 73, 77–82.
- Tawata, M., Ohtaka, M., Iwase, E., Ikegishi, Y., Aida, K., and Onaya, T. (1998). New Mitochondrial DNA Homoplasmic Mutations Associated With Japanese Patients With Type 2 Diabetes. *Diabetes* 47, 276–277.
- Tawata, M., Hayashi, J.I., Isobe, K., Ohkubo, E., Ohtaka, M., Chen, J., Aida, K., and Onaya, T. (2000). A new mitochondrial DNA mutation at 14577 T/C is probably a major pathogenic mutation for maternally inherited type 2 diabetes. *Diabetes* 49, 1269–1272.
- Tzen, C.-Y., Thajeb, P., Wu, T.-Y., and Chen, S.-C. (2003). Melas with point mutations involving tRNA<sup>Leu</sup> (A3243G) and tRNA<sup>Glu</sup>(A14693g). *Muscle Nerve* 28, 575–581.
- Uchigata, Y., Okada, T., Gong, J.-S., Yamada, Y., Iwamoto, Y., and Tanaka, M. (2002). A Mitochondrial Genotype Associated With the Development of Autoimmune-Related Type 1 Diabetes. *Diabetes Care* 25, 2106–2106.
- Vijaya Padma, V., Anitha, S., Santhini, E., Pradeepa, D., Tresa, D., Ganesan, P., Ishwarya, P., and Balakrishnan, R. (2010). Mitochondrial and nuclear gene mutations in the type 2 diabetes patients of Coimbatore population. *Mol Cell Biochem* 345, 223–229.
- Wang, D., Taniyama, M., Suzuki, Y., Katagiri, T., and Ban, Y. (2001). Association of the mitochondrial DNA 5178A/C polymorphism with maternal inheritance and onset of type 2 diabetes in Japanese patients. *Exp Clin Endocrinol Diabetes* 109, 361–364.
- Wang, M., Liu, H., Zheng, J., Chen, B., Zhou, M., Fan, W., Wang, H., Liang, X., Zhou, X., Eriani, G., et al. (2016). A Deafness- and Diabetes-associated tRNA Mutation Causes Deficient Pseudouridylation at Position 55 in tRNA<sup>Glu</sup> and Mitochondrial Dysfunction. *Journal of Biological Chemistry* 291, 21029–21041.
- Weiss, H., Wester-Rosenloef, L., Koch, C., Koch, F., Baltrusch, S., Tiedge, M., and Ibrahim, S. (2012). The Mitochondrial Atp8 Mutation Induces Mitochondrial ROS Generation, Secretory Dysfunction, and  $\beta$ -Cell Mass Adaptation in Conplastic B6-mtFVB Mice. *Endocrinology* 153, 4666–4676.
- Weng, S.-W., Liou, C.-W., Lin, T.-K., Wei, Y.-H., Lee, C.-F., Eng, H.-L., Chen, S.-D., Liu, R.-T., Chen, J.-F., Chen, I.-Y., et al. (2005). Association of Mitochondrial Deoxyribonucleic Acid 16189 Variant (T→C Transition) with Metabolic Syndrome in Chinese Adults. *The Journal of Clinical Endocrinology & Metabolism* 90, 5037–5040.
- Yang, T., Lam, C.-W., Tsang, M.-W., Tong, S.-F., Kam, G.Y.W., Chan, L.Y.S., Poon, P.M.K., Wu, X., and Pang, C.-P. (2002). Novel mitochondrial 16S rRNA mutation, 3200T→C, associated with adult-onset type 2 diabetes. *Chin Med J (Engl)* 115, 753–758.
- Yu, X., Wester-Rosenlöf, L., Gimsa, U., Holzhueter, S.-A., Marques, A., Jonas, L., Hagenow, K., Kunz, M., Nizze, H., Tiedge, M., et al. (2009). The mtDNA nt7778 G/T polymorphism affects autoimmune diseases and reproductive performance in the mouse. *Human Molecular Genetics* 18, 4689–4698.
- Zempo, H., Kim, S.-J., Fuku, N., Nishida, Y., Higaki, Y., Wan, J., Yen, K., Miller, B., Vicinanza, R., Miyamoto-Mikami, E., et al. (2021). A pro-diabetogenic mtDNA polymorphism in the mitochondrial-derived peptide, MOTS-c. *Aging*.
